# Supplementary material
Source: MDPI journal article supplement (https://www.mdpi.com/2673-8112/3/7/72)
Supplement: s1 [file s1]

**Supplementary File**

**Supplementary Table 1: COVID-19 Severity Classification: Steve Biko Academic Hospital Complex**

| <b><u>Disease Severity</u></b> | <b><u>Classification</u></b>                                                                                                                                                                                                                                                                                                                 |
|--------------------------------|----------------------------------------------------------------------------------------------------------------------------------------------------------------------------------------------------------------------------------------------------------------------------------------------------------------------------------------------|
| <b><u>Mild</u></b>             | <ol style="list-style-type: none"><li>1. Saturation &gt;94% on room air</li><li>2. Respiratory rate &lt; 25/min</li><li>3. Pulse &lt; 120/min</li><li>4. Temperature 36-39°C</li><li>5. Normal mental status</li></ol>                                                                                                                       |
| <b><u>Moderate</u></b>         | <ol style="list-style-type: none"><li>1. Saturation 90-94% on room air or PaO<sub>2</sub>/FiO<sub>2</sub> ratio 200-300</li><li>2. Respiratory rate &gt;25/minute &lt;30/minute</li><li>3. Pulse &gt; 120/minute</li><li>4. Temperature &gt;39</li><li>5. Normal mental status</li></ol>                                                     |
| <b><u>Severe</u></b>           | <p>Any of the following translate to severe disease:</p> <ol style="list-style-type: none"><li>1. Saturation &lt; 90% or PaO<sub>2</sub>/FiO<sub>2</sub> ratio &lt; 200</li><li>2. Respiratory rate &gt;30/minute</li><li>3. Hypotension or shock</li><li>4. Multi-organ dysfunction</li><li>5. Confusion or altered mental status</li></ol> |
